# Supplementary material for: The Fate of Copper Added to Surface Water: Field, Laboratory, and Modeling Studies
Source: PubMed Central journal article supplement (PMC6852694; doi:10.1002/etc.4440), 2019-06-24
Supplement: ETC-38-1386-s001.pdf [file ETC-38-1386-s001.pdf]

1  
2  
3  
4  
5  
6  
7  
8  
9  
10  
11  
12  
13  
14  
15  
16  
17  
18  
19  
20  
21  
22  
23  
24  
25

**THE FATE OF COPPER ADDED TO SURFACE WATER:  
FIELD, LABORATORY, AND MODELING STUDIES**

**Supporting Information**

Kevin J. Rader\*<sup>1</sup>, Richard F. Carbonaro<sup>1,2</sup>, Eric D. van Hullebusch<sup>3</sup>, Stijn Baken<sup>4</sup>, Katrien Delbeke<sup>4</sup>

- <sup>1</sup> Mutch Associates, LLC, Ramsey, New Jersey, USA
- <sup>2</sup> Chemical Engineering Department, Manhattan College, Riverdale, New York, USA
- <sup>3</sup> Institut de Physique du Globe de Paris, Sorbonne Paris Cité, Université Paris Diderot, Paris, France
- <sup>4</sup> European Copper Institute, Brussels, Belgium
- \* Corresponding author

**TRACE METAL REMOBILIZATION REVIEW TABLE****Table SI-1: Metal Remobilization from Studies Discussed in Skeaff et al. (2002)**

| <b>Source</b>              | <b>Water Body</b>                                                            | <b>Key Finding as Summarized in (Skeaff et al., 2002)</b>                                                                                                                                                 |
|----------------------------|------------------------------------------------------------------------------|-----------------------------------------------------------------------------------------------------------------------------------------------------------------------------------------------------------|
| Diamond et al. (1990)      | Enclosures in Perch Lake in Ontario, Canada                                  | Assuming iron and cobalt are representative of first row transition metals, one would expect water-to-sediment rate constants for copper to be in the range of 200 - 300 times the reverse.               |
| Xue et al. (1997)          | Lakes Sempach and Greifen in Switzerland                                     | No copper remobilization from Lake Greifen; partial copper release from Lake Sempach likely enhanced by artificial oxygenation. Copper released redeposited with precipitated iron/manganese oxides.      |
| van den Berg et al. (1999) | River Meuse in the Netherlands                                               | Degree of trace metal (including copper) remobilization less than 2% amount deposited.                                                                                                                    |
| Hunt and Smith (1983)      | Seawater microcosms using sediments from Narragansett Bay, Rhode Island, USA | Observed a release of copper and other metal from contaminated sediments but cautioned that extrapolation to natural systems would require consideration of additional factors.                           |
| Zwolsman et al. (1997)     | Scheldt estuary in the Netherlands and Belgium.                              | Dissolved copper and other metals were mobilized in estuary through the deoxidation of sulfides in suspended matter upon encountering the higher oxygen concentrations associated with the lower estuary. |
| Shaw et al. (1990)         | Sites of the coast of California, USA                                        | Metal transport to and from the sediment is complex; sample location showing Cr, Co, Ni, and Cu release had concentrations lower than 2 µg/L                                                              |
| Klinkhammer et al. (1982)  | two deep ocean sites in the central equatorial Pacific                       | Copper flux from sediment to overlying water was 5-10 greater than flux to sediment; however, copper concentrations near the sediment interface were low (0.03 - 0.45 µg/L)                               |

27

28

29

30

31

32

33

34

35 **TICKET-UWM SIMULATIONS**

36 **BACKGROUND INFORMATION ON THE TICKET-UWM**

37 A Unit World Model (UWM) is a screening level model used to assess the fate and effects of chemicals  
38 through simultaneous consideration of chemical partitioning, transport, reactivity, and bioavailability  
39 (Mackay, 1979, 1991; Mackay and Paterson, 1991). A UWM for metals has recently been developed that  
40 explicitly includes a description of the effect of metal speciation in assessing the long-term fate and effects  
41 of metals in the environment (Figure SI-1) (Farley et al., 2007; Farley et al., 2011).

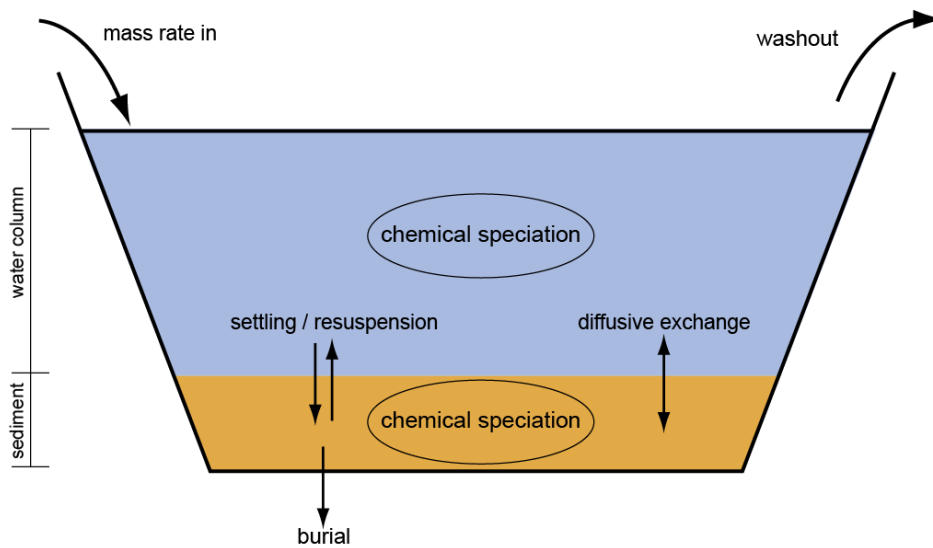

42 **Figure SI-1:** Conceptual model for the TICKET Unit World Model for Metals  
in Lakes (TICKET-UWM).

43 The model builds on previous screening-level calculations that have been developed for organic  
44 contaminants. Unlike previous models, however, the UWM for Metals in Lakes explicitly considers the  
45 effects of chemical speciation on metal partitioning, transport and bioavailability in the lake water column  
46 and underlying sediments. The numerical engine for the model calculations is the Tableau Input Coupled  
47 Kinetics Equilibrium Transport (TICKET) model (Farley et al., 2008). The model domain consists of a  
48 single oxic water column layer and a single sediment layer. Specific processes considered in the UWM for

49 Metals in Lakes (hereafter referred to as the TICKET-UWM) include (i) dissolved and particulate phase  
50 transport between the overlying water and sediment; (ii) metal binding to inorganic ligands, dissolved  
51 organic carbon (DOC) and particulate organic carbon (POC) (using information from WHAM (Tipping,  
52 1993, 1994; Tipping, 1998; Tipping and Hurley, 1992; Tipping et al., 2011), hydrous ferric oxide (HFO)  
53 (Dzombak and Morel, 1990), and hydrous manganese oxide (HMO) (Tonkin et al., 2004); (iii) metal  
54 binding to biological receptors using information from the Biotic Ligand Model (BLM) (Di Toro et al.,  
55 2001; Santore et al., 2001); (iv) metal precipitation as (hydr)oxides, carbonates, sulfates, and sulfides using  
56 information from MINEQL+ software (Schecher and McAvoy, 2003); (v) dissolution kinetics for metal  
57 powders, massives, concentrates; average-annual cycling of organic matter and sulfide production in the  
58 lake; and (vi) simplified HFO and HMO cycles.

## 59 **DETAILS OF EUSES MODEL LAKE TICKET-UWM SIMULATIONS**

### 60 *Water Column Simulations*

61 The water chemistries for the EUSES Model Lake TICKET-UWM simulations were based on directives in  
62 the EUSES 2.0 report (EC, 2004) and Annex 10 of the *Globally Harmonized System of Classification and*  
63 *Labelling of Chemicals* (GHS) (United Nations, 2017):

- 64 • Suspended solids concentrations was specified as 15 mg/L (EC, 2004). Using the this  
65 concentration and  $f_{OC} = 0.1$  (EC, 2004), the POC used was 1.5 mg/L.
- 66 • Annex 10 reports a TOC limit of 2 mg/L. This annex describes a laboratory protocol for  
67 transformation/dissolution experiments in control solutions. Since the scope of these  
68 experiments does not include the introduction of POC, the TOC limit above is interpreted as a  
69 DOC value. Therefore, the DOC value of the generalized lake environment simulations was  
70 set at 2 mg/L.

71           • The solution composition (major cations/anions) for 3 different pH values was based upon data  
72           in Table A10.1 from Annex 10.

73 Copper addition was modeled in TICKET-UWM simulations as a single instantaneous load of a soluble  
74 copper salt (e.g.,  $\text{CuSO}_4 \cdot 5\text{H}_2\text{O}$ ). Soluble salts dissolve instantaneously and completely in the water column.  
75 This contrasts with metal powders/massives which may dissolve at slower rates, may be only sparingly  
76 soluble, and, depending on particle size and density, may be subject to rapid settling. Modeling the addition  
77 of copper as a salt, therefore, represents a worst-case scenario for metal release and persistence in the water  
78 column.

79 There exist three potential approaches for assessing copper removal in the model:

80       1. Copper is added to the model water column as a soluble salt where dissolution is instantaneous  
81       (unlike powders or massives which take time to dissolve). The initial copper salt concentration  
82       (i.e. nominal or added concentration) is set equal to a relevant value. Based upon the assumption  
83       of equilibrium speciation (partitioning), the added copper immediately partitions between the  
84       suspended particles and solution phase resulting in an initial dissolved copper concentration less  
85       than the initial copper added to the computational system. This initial instantaneous copper  
86       removal from the soluble phase to the particles is counted toward the percent removal. After the  
87       initial removal, copper removal continues (non-instantaneously) as the finite amount of total copper  
88       added to the system maintains its equilibrium with suspended particles and these particles  
89       continually settle to the sediment bed. This approach includes two removal components: 1)  
90       removal of initially soluble metal associated with the immediate establishment of solid-solution  
91       equilibrium and 2) the removal associated with the settling of particles. According to this approach,  
92       the fraction remaining is calculated by dividing the dissolved metal concentration at time  $t$ ,  $C_{\text{Diss}}(t)$ ,  
93       by the initial total metal concentration,  $C_{\text{Tot}}(0)$ . Hereafter this will be referred to as Approach 1.

94

95 2. The initial total copper concentration is set equal to a relevant value, and the removal of total copper  
96 (particulate + dissolved) in the water column is tracked. According to this approach, the fraction  
97 remaining is calculated by dividing the total metal concentration at time  $t$ ,  $C_{Tot}(t)$ , by the initial total  
98 metal concentration,  $C_{Tot}(0)$ . This approach is conservative in that it assumes that copper on  
99 particles is equally bioavailable as dissolved copper. Hereafter this will be referred to as  
100 Approach 2.

101  
102 3. The initial total copper concentration is set at the relevant value, and the removal of dissolved  
103 copper is tracked. According to this approach, removal is calculated by dividing the dissolved  
104 copper concentration at time  $t$ ,  $C_{Diss}(t)$ , by the initial dissolved copper concentration,  $C_{Diss}(0)$ .  
105 Hereafter this will be referred to as Approach 3.

106 Approaches 1 and 3 are more consistent with the GHS since they focus on soluble metal. Emphasis is  
107 placed on simulation results from Approach 1 but results from Approaches 2 and 3 are indicated as well.  
108 If slow enough, the kinetics of the adsorption processes may influence the copper removal rate for  
109 Approach 1. However, this analysis is beyond the scope of the current work and is a subject for future  
110 investigations. Available data on adsorption rates in natural system indicate considerable variation in the  
111 timeframe required for copper adsorption. Estimated equilibration times (i.e.,  $4[k_f' + k_b]^{-1}$ ) range from a  
112 couple of hours to as much as three weeks (Gee and Bruland, 2002; Herzl et al., 2003; Millward et al.,  
113 1992).

114 The initial total copper concentration (i.e. the spiking concentration) in the water column was the values  
115 contained in Table SI-2.

116

117

**Table SI-2: Summary of Initial Copper Concentrations Used for TICKET-UWM Simulations**

| Metal  | pH 6    |       | pH 7    |       | pH 8    |       |
|--------|---------|-------|---------|-------|---------|-------|
|        | Chronic | Acute | Chronic | Acute | Chronic | Acute |
| Copper | 20      | 25    | 7       | 35    | 11      | 30    |

All concentration in units of  $\mu\text{g/L}$

118

119 A summary of TICKET-UWM parameters used for the EUSES Model Lake calculations is shown in Table  
 120 SI-3. The chemical composition associated with the three water chemistries in Table SI-3 is generally  
 121 consistent with summaries prepared from EU monitoring databases (ARCHE, 2013).

**Table SI-3: TICKET-UWM Input for the EUSES Model Lake Simulations**

| Parameter                                         | Value                          |                   |                   |
|---------------------------------------------------|--------------------------------|-------------------|-------------------|
|                                                   | EUSES Model Lake               |                   |                   |
| Volume, $\text{m}^3$                              | $3.6 \times 10^9$ <sup>a</sup> |                   |                   |
| Surface area, $\text{km}^2$                       | 1200 <sup>a</sup>              |                   |                   |
| Average water depth, m                            | 3 <sup>a</sup>                 |                   |                   |
| Residence time, yr                                | 0.110 <sup>a</sup>             |                   |                   |
| Settling rate, m/d                                | 2.5 <sup>a</sup>               |                   |                   |
| Burial rate, cm/yr                                | 0.3 <sup>a</sup>               |                   |                   |
| Resuspension rate, cm/yr                          | 2.44 <sup>b</sup>              |                   |                   |
| Diffusive exchange, cm/day                        | 0.24 <sup>a,c</sup>            |                   |                   |
| Sediment $f_{oc}$                                 | 0.05 <sup>a</sup>              |                   |                   |
| Sediment solids conc., $\text{g/L}_{\text{bulk}}$ | 500 <sup>a</sup>               |                   |                   |
| Depth of active sediment, cm                      | 3 <sup>a</sup>                 |                   |                   |
| AVS, $\mu\text{mol/g}_{\text{dry}}$               | 0.77 <sup>d</sup>              |                   |                   |
| Sediment HFO, mg/kg                               | 0 (anoxic sediment)            |                   |                   |
| Sediment HMO, mg/kg                               | 0 (anoxic sediment)            |                   |                   |
| Initial Cu conc., $\mu\text{g/L}$ as Cu           | 35                             |                   |                   |
| Initial Sed Cu conc., $\mu\text{g/g}$             | 0                              |                   |                   |
| Suspended solids, mg/L                            | 15 <sup>a</sup>                |                   |                   |
| Suspended solids foc                              | 0.1 <sup>a</sup>               |                   |                   |
| POC, mg/L                                         | 1.5 <sup>a</sup>               |                   |                   |
| DOC, mg/L                                         | 2.0 <sup>e</sup>               |                   |                   |
| Water column pH                                   | 6.09 <sup>e</sup>              | 7.07 <sup>e</sup> | 8.00 <sup>e</sup> |
| Sediment pH                                       | 6.09                           | 7.07              | 8.00              |
| Alkalinity, mg/L as $\text{CaCO}_3$               | 3.85                           | 7.47              | 37.2              |
| Calcium, mg/L                                     | 8.0                            | 32.1              | 80.1              |
| Magnesium, mg/L                                   | 1.2                            | 4.9               | 12.1              |
| Sodium, mg/L                                      | 1.8                            | 3.4               | 18.0              |
| Potassium, mg/L                                   | 0.3                            | 1.2               | 3.02              |

**Table SI-3: TICKET-UWM Input for the EUSES Model Lake Simulations**

| Parameter                        | Value            |      |      |
|----------------------------------|------------------|------|------|
|                                  | EUSES Model Lake |      |      |
| Sulfate, mg/L as SO <sub>4</sub> | 4.8              | 19.2 | 47.9 |
| Chloride                         | 14.5             | 57.8 | 145  |

- <sup>a</sup> Data from EUSES model lake (EC, 2004; European Chemicals Agency, 2010). Surface area and volume values quoted refer to a regional scale assessment. They do not influence the removal simulations.
- <sup>b</sup> Calculated using the settling velocity, suspended solids concentration, sediment bulk solid concentration, and the burial (net sedimentation) rate shown in the table using a steady-state solids balance (Chapra, 1997).
- <sup>c</sup> EUSES pore water side mass transfer coefficient. Mass transfer resistance is assumed to be all on the sediment side (Di Toro et al., 1981).
- <sup>d</sup> 10<sup>th</sup> percentile AVS concentration for a Flemish dataset (Vangheluwe et al., 2005)
- <sup>e</sup> Water chemistries for the three pH values were taken from Annex 10 of the Globally Harmonized System of Classification and Labelling of Chemicals (United Nations, 2017).

122

123 The resuspension rate (Table SI-3) was calculated from a solid mass balance in the active sediment layer  
124 assuming steady-state conditions (no accumulation/depletion of sediment solids). The following equation  
125 was used:

126 
$$v_r = v_s \frac{m}{m_a} - v_b \quad (\text{SI-1})$$

127 where  $v_s$  is the settling velocity (2.5 m/d),  $m$  is the water column suspended solids concentration (15 mg/L),  
128  $m_a$  is the sediment solids concentration (0.5 kg/L), and  $v_b$  is the burial rate (0.3 cm/yr). To be consistent  
129 with laboratory/mesocosm/field removal tests, the diluting effect of flow into the system was minimized by  
130 increasing the hydraulic residence time of the model lake system from the EUSES value of 40 days (0.11  
131 year) to 300 years.

132 It should be noted that the EUSES Model Lake is prescribed to have a sediment compartment that is 10%  
133 aerobic. At present, TICKET-UWM simulations utilize a single sediment layer and cannot directly  
134 reproduce this condition. The redox state (oxic or anoxic) of the sediment layer in the TICKET-UWM is  
135 specified by the user. This selection determines the sorption/precipitation reactions included in the  
136 simulation. For the EUSES Model Lake calculations, an anoxic sediment layer was used with the AVS



137 concentration set to the 10<sup>th</sup> percentile value from EU monitoring data (Vangheluwe et al., 2005) (additional  
138 information from: <http://echa.europa.eu/copper-voluntary-risk-assessment-reports> [environment/Risk  
139 Characterization/Chapter 3.3.7.1.3.]). This reflects a level of conservatism with respect to the amount of  
140 copper capable of being bound by sulfide in sediments.

141 Simulations were made using empirical  $K_D$  values and  $K_D$  values calculated by WHAM VII (Tipping et al.,  
142 2011). For the Empirical  $K_D$  simulation, the surface water and sediment log  $K_D$  values were specified as  
143 4.48 and 4.39 based on the copper partition coefficient review of Heijerick and Van Sprang (2005). For  
144 the Calculated  $K_D$  simulation,  $K_D$  values at each time step were generated with WHAM VII. Copper binding  
145 to HFO and HMO in the water column was not considered.

146 Based on the suspended solids concentration of 15 mg/L and log  $K_D$  of 4.48, approximately 31% of the  
147 copper added to the water column was bound to suspended particles for the Empirical  $K_D$  simulation for the  
148 EUSES Model Lake. The decrease of copper in time for the Empirical  $K_D$  and Calculated  $K_D$  simulations  
149 is shown below in Figure SI-2. Summaries of EUSES Model Lake TICKET-UWM simulation results are  
150 presented in Table SI-4 through Table SI-7 below.

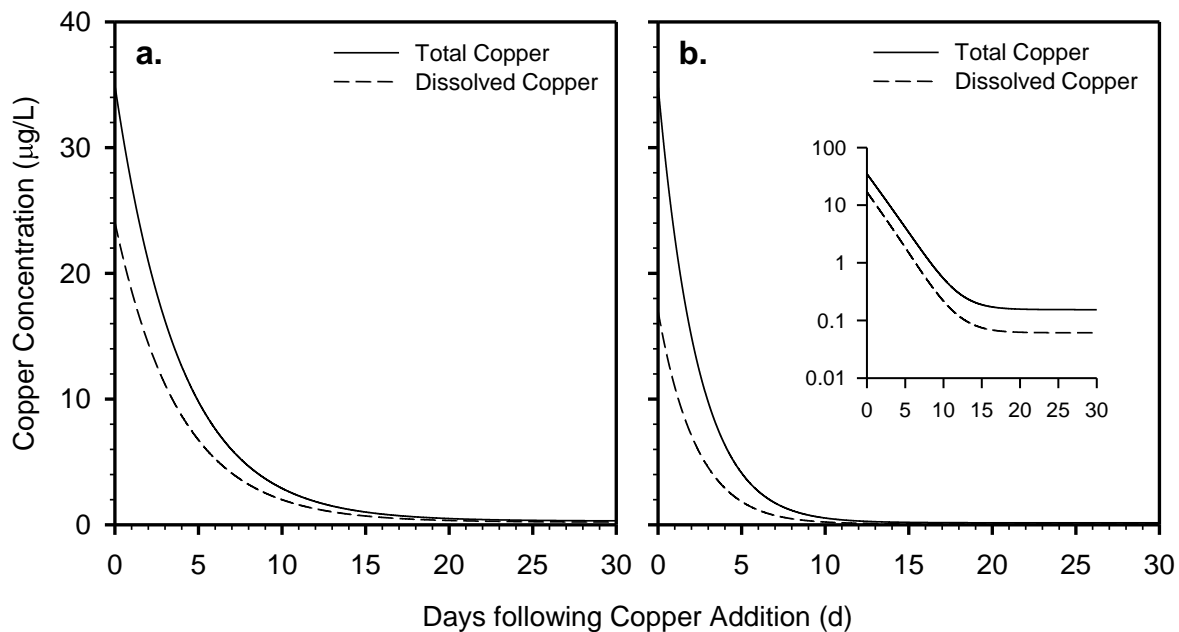

**Figure SI-2:** Time series of total and dissolved copper for the EUSES Model Lake with  $K_D$  a) specified at empirical values (surface water  $\log K_D$ : 4.48; sediment  $\log K_D$ : 4.39) and b) calculated at each time step using a WHAM VII speciation calculation.

151

152

153

154

155

156

157

158

159

160

**Table SI-4: Summary of EUSES Model Lake Empirical  $K_D$  Simulation Results**

| <b>Removal Approach and Output Quantity</b> | <b>Result from Model</b> |
|---------------------------------------------|--------------------------|
| <b>1: <math>C_D(t)/C_T(0)</math></b>        |                          |
| Time for 70% removal, days                  | 3.25                     |
| $\log K_D$ range <sup>b</sup>               | 4.48                     |
| Fraction particulate range <sup>b</sup>     | 0.312                    |
| <b>2: <math>C_T(t)/C_T(0)</math></b>        |                          |
| Time for 70% removal, days                  | 4.72                     |
| $\log K_D$ range <sup>b</sup>               | 4.48                     |
| Fraction particulate range <sup>b</sup>     | 0.312                    |
| <b>3: <math>C_D(t)/C_D(0)</math></b>        |                          |
| Time for 70% removal, days                  | 4.72                     |
| $\log K_D$ range <sup>b</sup>               | 4.48                     |
| Fraction particulate range <sup>b</sup>     | 0.312                    |

<sup>a</sup> 70% removal occurs instantly via initial solid-solution equilibrium partitioning. Instead of  $\log K_D$  and fraction particulate value ranges, the values at  $t = 0$  are indicated.

<sup>b</sup> These ranges were calculated using data prior to the time at which 70% removal was achieved.

**Table SI-5: Summary of EUSES Model Lake Calculated  $K_D$  Simulation Results for Different Water Chemistries and Copper Loadings**

| Removal Approach and Output Quantity    | pH = 6.09     |               | pH = 7.07     |               | pH = 8.00     |               |
|-----------------------------------------|---------------|---------------|---------------|---------------|---------------|---------------|
|                                         | 20 µg/L       | 25 µg/L       | 7 µg/L        | 35 µg/L       | 11 µg/L       | 30 µg/L       |
| <b>1: <math>C_D(t)/C_T(0)</math></b>    |               |               |               |               |               |               |
| Time for 70% removal, days              | 0.922         | 0.961         | 0.918         | 1.11          | 1.01          | 1.34          |
| Log $K_D$ range <sup>a</sup>            | 4.89 - 4.91   | 4.87 - 4.90   | 4.89 - 4.91   | 4.85 - 4.86   | 4.85 - 4.89   | 4.77 - 4.81   |
| Fraction particulate range <sup>a</sup> | 0.537 - 0.548 | 0.529 - 0.542 | 0.539 - 0.549 | 0.513 - 0.521 | 0.514 - 0.538 | 0.470 - 0.492 |
| <b>2: <math>C_T(t)/C_T(0)</math></b>    |               |               |               |               |               |               |
| Time for 70% removal, days              | 2.69          | 2.71          | 2.68          | 2.83          | 2.72          | 2.98          |
| Log $K_D$ range <sup>a</sup>            | 4.89 - 4.93   | 4.87 - 4.93   | 4.89 - 4.94   | 4.85 - 4.88   | 4.85 - 4.94   | 4.77 - 4.86   |
| Fraction particulate range <sup>a</sup> | 0.537 - 0.561 | 0.529 - 0.559 | 0.539 - 0.568 | 0.513 - 0.531 | 0.514 - 0.567 | 0.470 - 0.523 |
| <b>3: <math>C_D(t)/C_D(0)</math></b>    |               |               |               |               |               |               |
| Time for 70% removal, days              | 2.57          | 2.57          | 2.54          | 2.75          | 2.48          | 2.75          |
| Log $K_D$ range <sup>a</sup>            | 4.89 - 4.93   | 4.87 - 4.92   | 4.89 - 4.94   | 4.85 - 4.88   | 4.85 - 4.94   | 4.77 - 4.86   |
| Fraction particulate range <sup>a</sup> | 0.537 - 0.560 | 0.529 - 0.558 | 0.539 - 0.567 | 0.513 - 0.530 | 0.514 - 0.564 | 0.470 - 0.518 |

<sup>a</sup> These ranges were calculated using data prior to the time at which 70% removal was achieved.

**Table SI-5. Continued**

| Removal Approach and Output Quantity        | pH = 6.09     |               | pH = 7.07     |               | pH = 8.00     |               |
|---------------------------------------------|---------------|---------------|---------------|---------------|---------------|---------------|
|                                             | 100 µg/L      | 1,000 µg/L    | 100 µg/L      | 1,000 µg/L    | 100 µg/L      | 1,000 µg/L    |
| <b>1: C<sub>D</sub>(t)/C<sub>T</sub>(0)</b> |               |               |               |               |               |               |
| Time for 70% removal, days                  | 1.37          | 4.16          | 1.35          | 4.37          | 1.99          | --- a         |
| log <i>K<sub>D</sub></i> range <sup>a</sup> | 4.75 - 4.80   | 4.21 - 4.46   | 4.75 - 4.81   | 4.18 - 4.45   | 4.58 - 4.69   | 5.82          |
| Fraction particulate range <sup>a</sup>     | 0.458 - 0.489 | 0.194 - 0.303 | 0.459 - 0.492 | 0.186 - 0.295 | 0.361 - 0.425 | 0.908         |
| <b>2: C<sub>T</sub>(t)/C<sub>T</sub>(0)</b> |               |               |               |               |               |               |
| Time for 70% removal, days                  | 3.00          | 5.52          | 3.00          | 5.72          | 3.51          | 1.85          |
| log <i>K<sub>D</sub></i> range <sup>a</sup> | 4.75 - 4.86   | 4.21 - 4.56   | 4.75 - 4.85   | 4.18 - 4.55   | 4.58 - 4.77   | 5.19 - 5.82   |
| Fraction particulate range <sup>a</sup>     | 0.458 - 0.522 | 0.194 - 0.353 | 0.459 - 0.516 | 0.186 - 0.345 | 0.361 - 0.469 | 0.701 - 0.908 |
| <b>3: C<sub>D</sub>(t)/C<sub>D</sub>(0)</b> |               |               |               |               |               |               |
| Time for 70% removal, days                  | 2.73          | 4.85          | 2.74          | 5.05          | 3.07          | 8.86          |
| Log <i>K<sub>D</sub></i> range <sup>a</sup> | 4.75 - 4.85   | 4.21 - 4.51   | 4.75 - 4.85   | 4.18 - 4.50   | 4.58 - 4.75   | 4.42 - 5.82   |
| Fraction particulate range <sup>a</sup>     | 0.458 - 0.517 | 0.194 - 0.327 | 0.459 - 0.514 | 0.186 - 0.320 | 0.361 - 0.458 | 0.281 - 0.908 |

<sup>a</sup> These ranges were calculated using data prior to the time at which 70% removal was achieved.

167

168

169

170

171

**Table SI-6: Summary of EUSES Model Lake Simulation Results for Settling Velocity of 0.24 m/d**

| Metal Removal Approach and Output Quantity | Empirical $K_D$ | Calculated $K_D$ |               |               |
|--------------------------------------------|-----------------|------------------|---------------|---------------|
|                                            |                 | pH = 6.09        | pH = 7.07     | pH = 8.00     |
| <b>1: <math>C_D(t)/C_T(0)</math></b>       |                 |                  |               |               |
| Time for 70% removal, days                 | 32.6            | 9.73             | 11.2          | 13.5          |
| log $K_D$ range <sup>a</sup>               | 4.48            | 4.87 - 4.90      | 4.85 - 4.86   | 4.77 - 4.81   |
| Fraction particulate range <sup>a</sup>    | 0.312           | 0.529 - 0.543    | 0.513 - 0.521 | 0.470 - 0.492 |
| <b>2: <math>C_T(t)/C_T(0)</math></b>       |                 |                  |               |               |
| Time for 70% removal, days                 | 47.3            | 27.4             | 28.6          | 30.1          |
| log $K_D$ range <sup>a</sup>               | 4.48 - 4.48     | 4.87 - 4.93      | 4.85 - 4.88   | 4.77 - 4.87   |
| Fraction particulate range <sup>a</sup>    | 0.312 - 0.312   | 0.529 - 0.559    | 0.513 - 0.531 | 0.470 - 0.525 |
| <b>3: <math>C_D(t)/C_D(0)</math></b>       |                 |                  |               |               |
| Time for 70% removal, days                 | 47.3            | 26.0             | 27.7          | 27.8          |
| log $K_D$ range <sup>a</sup>               | 4.48 - 4.48     | 4.87 - 4.93      | 4.85 - 4.88   | 4.77 - 4.86   |
| Fraction particulate range <sup>a</sup>    | 0.312 - 0.312   | 0.529 - 0.558    | 0.513 - 0.531 | 0.470 - 0.519 |

<sup>a</sup> These ranges were calculated using data prior to the time at which 70% removal was achieved.

172

173

174

175

**Table SI-7: Summary of EUSES Model Simulation Results with DOC increased from 2 to 15 mg/L**

| Metal Removal Approach and Output Quantity | Calculated $K_D$ |               |               |
|--------------------------------------------|------------------|---------------|---------------|
|                                            | pH = 6.09        | pH = 7.07     | pH = 8.00     |
| <b>1: <math>C_D(t)/C_T(0)</math></b>       |                  |               |               |
| Time for 70% removal, days                 | 8.43             | 9.08          | 8.67          |
| log $K_D$ range <sup>a</sup>               | 4.07 - 4.08      | 4.02 - 4.06   | 4.02 - 4.08   |
| Fraction particulate range <sup>a</sup>    | 0.149 - 0.151    | 0.135 - 0.146 | 0.137 - 0.152 |
| <b>2: <math>C_T(t)/C_T(0)</math></b>       |                  |               |               |
| Time for 70% removal, days                 | 9.79             | 10.4          | 10.0          |
| log $K_D$ range <sup>a</sup>               | 4.06 - 4.08      | 4.02 - 4.06   | 4.02 - 4.08   |
| Fraction particulate range <sup>a</sup>    | 0.148 - 0.151    | 0.135 - 0.148 | 0.137 - 0.152 |
| <b>3: <math>C_D(t)/C_D(0)</math></b>       |                  |               |               |
| Time for 70% removal, days                 | 9.82             | 10.3          | 9.87          |
| log $K_D$ range <sup>a</sup>               | 4.06 - 4.08      | 4.02 - 4.06   | 4.02 - 4.08   |
| Fraction particulate range <sup>a</sup>    | 0.148 - 0.151    | 0.135 - 0.148 | 0.137 - 0.152 |

<sup>a</sup> These ranges were calculated using data prior to the time at which 70% removal was achieved.

178 *Detailed Sediment Simulations*

179 The water column in the TICKET-UWM is represented as being oxic with a negligible sulfide  
180 concentration. In accordance with the equilibrium mass action law, any copper sulfide solid resuspended  
181 from the sediment layer to the water column immediately dissolves, releasing copper to re-equilibrate  
182 between the settling particles the dissolved phase in the water column. Since the immediate redistribution  
183 supplies dissolved copper in the water column, the model calculations are closer to a worst-case scenario  
184 for dissolved copper removal.

185 For the detailed sediment simulations, the EUSES Model Lake water chemistry (Table SI-3) was used for  
186 the surface water. Model simulations used bulk and pore water sediment chemistry from several field  
187 studies (Table SI-8). The base case sediment pH was 7.56. Copper log  $K_D$  values in sediment were specified  
188 using the Calculated  $K_D$  approach (described above). Simulations were performed for an oxic sediment and  
189 an anoxic sediment to assess the two redox end members occurring in natural sediment. For the oxic  
190 sediment simulations, sulfide production and copper sulfide precipitation were not included. Copper was  
191 allowed to sorb to POC, HFO, and HMO in the sediment and precipitate as carbonates and/or hydroxides.  
192 For the anoxic sediment simulations, copper binding to HFO and HMO was not considered. Copper was  
193 allowed to sorb to POC and precipitate as sulfides, carbonates, and/or hydroxides.

194 To model the formation and dissolution of copper sulfide solid, the following reaction and solubility product  
195 from Dyrssen and Kremling (1990) were used initially:

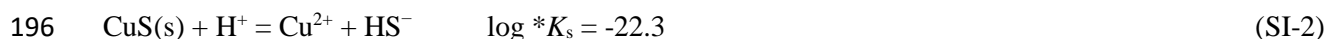

197 Simpson et al. (2000) suggest  $\text{Cu}_2\text{S}$  is an important copper solid phase in anoxic sediments. The solubility  
198 of this species has been described with the following solubility product in (Dyrssen and Kremling, 1990):

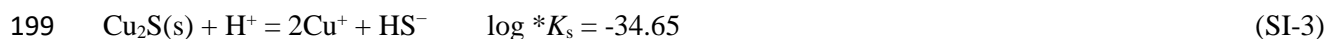

200 Simulations were made with both copper-sulfide solid species.



**Table SI-8: Bulk and Pore Water Sediment Chemistry Parameters**

| Parameter                             | Value               |
|---------------------------------------|---------------------|
| pH                                    | 7.56 <sup>a</sup>   |
| Ca <sup>2+</sup>                      | 144 <sup>a</sup>    |
| Mg <sup>2+</sup>                      | 38.1 <sup>a</sup>   |
| Na <sup>+</sup> , mg/L                | 141 <sup>a</sup>    |
| K <sup>+</sup> , mg/L                 | 6.19 <sup>a</sup>   |
| Cl <sup>-</sup> , mg/L                | 79 <sup>a</sup>     |
| SO <sub>4</sub> <sup>2-</sup> , mg/L  | 65 <sup>a</sup>     |
| Alkalinity, mg/L as CaCO <sub>3</sub> | 478 <sup>b</sup>    |
| DOC, mg/L                             | 21 <sup>c</sup>     |
| TOC, %                                | 3.7 <sup>d</sup>    |
| Iron, %                               | 2.9 <sup>e</sup>    |
| HFO, mg HFO/kg                        | 18,600 <sup>f</sup> |
| Manganese, mg/kg                      | 404 <sup>g</sup>    |
| HMO, mg HMO/kg                        | 154 <sup>f</sup>    |
| AVS, μmol/g <sub>dry</sub>            | 1,9.1 <sup>h</sup>  |
| Pore water [Fe <sup>2+</sup> ], mg/L  | 0.912 <sup>i</sup>  |
| Settling rate, m/d                    | 2.5 <sup>j</sup>    |
| Burial rate, cm/yr                    | 0.3 <sup>j</sup>    |
| Resuspension rate, cm/yr              | 2.44 <sup>j</sup>   |
| Diffusive exchange, cm/day            | 0.24 <sup>j</sup>   |
| Sediment solids conc., g/L            | 500 <sup>j</sup>    |
| Active depth, cm                      | 3 <sup>j</sup>      |

<sup>a</sup> From a monitoring dataset on Flemish navigable waterways (de Deckere et al., 2000). For conversion of hardness to Ca<sup>2+</sup> and Mg<sup>2+</sup>, a molar ratio of Ca:Mg = 2.20 was used based on average river water in Stumm and Morgan (1996). Na<sup>+</sup> and K<sup>+</sup> were estimated using the SO<sub>4</sub><sup>2-</sup> and Cl<sup>-</sup> data from (de Deckere et al., 2000) and a seawater/river water mixing method similar to Di Toro et al. (2005).

<sup>b</sup> Unpublished data from Besser et al. (2011).

<sup>c</sup> 50<sup>th</sup> percentile of data from Flemish sediments (AMINAL/AWZ, 1995).

<sup>d</sup> Geometric mean of 10<sup>th</sup> percentile values from 4 datasets: Netherlands (0.001; 0.029, 0.034, 0.045, 0.052 and 0.07 g organic carbon/g dry wt; M. Vangheluwe, personal communication), Finland, UK, and Spain (EURAS, 2008).

<sup>e</sup> Geometric mean of 50<sup>th</sup> percentile values from 3 datasets: Finland, UK, and Spain (EURAS, 2008).

<sup>f</sup> Determined using a relationship between total recoverable Fe/Mn and the Fe/Mn in a sequential extraction fraction most closely related to HFO/HMO as determined by HydroQual and Manhattan College (2010) using the following formula weights: 89 g HFO/mol Fe and 119 g HMO/mol Mn.

<sup>g</sup> Besser et al. (2011).

<sup>h</sup> Geometric mean of 10<sup>th</sup> and 50<sup>th</sup> percentile values from 5 datasets: Flanders and Netherlands (Vangheluwe et al., 2005), Finland, UK, and Spain (EURAS, 2008).

<sup>i</sup> An average dissolved Fe(II) in the porewater of 2.77 mg/L was calculated based on data from Wersin et al. (1991), Gallon et al. (2004), and Canavan et al. (2007). Using the porewater chemistry data in this table, WHAM6 calculations were used to determine the ferrous ion concentration, [Fe<sup>2+</sup>].

<sup>j</sup> Values from Table SI-3 **Table SI-12**

202

203 Water column results for the anoxic simulation indicate that around day 24 of the simulation, the total and

204 dissolved copper concentrations leveled off. Similar behavior was noted for the water column runs (Figure

205 SI-2). For the remainder of the 365-day simulation, water column copper concentrations decreased only

206 very slightly. Between day 24 and day 365, the ranges of water column copper concentrations were 140 to

207 160 ng/L (total) and 56 to 62 ng/L (dissolved) respectively. These dissolved values are greater than 150

208 times lower than the 70% removal concentration of 10.5  $\mu\text{g/L}$ . The relatively flat copper response between

209 day 24 and 365 in the water column was the result of a local equilibrium established between the settling

210 flux of copper (directed into the sediment) and the resuspension flux (directed out of the sediment). The

211 local equilibrium can be referred to as a *pseudo steady-state*. The smaller burial flux slowly depleted copper

212 from the system moving the water column / sediment system toward the final steady-state in which the

213 water column and sediment copper concentrations were zero. Detailed output from anoxic and oxic

214 simulations is shown in Table SI-9.

| <b>Table SI-9: Results of Sediment Simulations</b>            |                                 |               |           |                                           |             |
|---------------------------------------------------------------|---------------------------------|---------------|-----------|-------------------------------------------|-------------|
| <b>Sediment Type</b>                                          |                                 | <b>Anoxic</b> |           | <b>Anoxic<br/>(using Cu<sub>2</sub>S)</b> | <b>Oxic</b> |
| <b>AVS, <math>\mu\text{mol/g}</math></b>                      |                                 | <b>9.1</b>    | <b>1</b>  | <b>9.1</b>                                | <b>0</b>    |
| <b>Water Column Removal Data</b>                              |                                 |               |           |                                           |             |
| Time for 70% Removal                                          | days                            | 3.4           | 3.4       | 3.4                                       | 3.4         |
| $[0.3 \times C_T(0)] / \text{Max QSS } C_T^i$                 |                                 | 67            | 67        | 68                                        | 66          |
| <b>Pseudo Steady-State Water Column Copper Concentrations</b> |                                 |               |           |                                           |             |
| Tot. Cu Range <sup>a</sup>                                    | ng/L                            | 140 - 160     | 140 - 160 | 140 - 150                                 | 140 - 160   |
| Diss. Cu Range <sup>a</sup>                                   | ng/L                            | 56 - 62       | 56 - 62   | 56 - 61                                   | 57 - 64     |
| Water column log $K_D$ <sup>a</sup>                           | --- <sup>b</sup>                | 5.00          | 5.00      | 5.00                                      | 5.00        |
| <b>Mass Balance at 1 Year</b>                                 |                                 |               |           |                                           |             |
| Mass in the Water Column                                      | %                               | 0.40          | 0.40      | 0.40                                      | 0.41        |
| Mass in the Sediment                                          | %                               | 90.2          | 90.2      | 90                                        | 90          |
| Total Settling IN                                             | %                               | 176           | 176       | 176                                       | 178         |
| Total Resusp. OUT                                             | %                               | 76.6          | 76.6      | 77                                        | 76.6        |
| Total Burial OUT                                              | %                               | 9.42          | 9.42      | 9.4                                       | 9.41        |
| Total Diffusion NET <sup>c</sup>                              | %                               | 0.133         | 0.133     | 0.133                                     | -1.47       |
| <b>Sediment Speciation Data <sup>d</sup></b>                  |                                 |               |           |                                           |             |
| Total Sediment Cu                                             | $\mu\text{g/g}$                 | 6.9           | 6.9       | 6.9                                       | 6.9         |
|                                                               | $\mu\text{mol/g}$               | 0.11          | 0.11      | 0.11                                      | 0.11        |
| “Free” Cu <sup>2+</sup>                                       | ng/L <sub>pw</sub> <sup>e</sup> | 1.5E-13       | 1.5E-13   | 1.7E-14                                   | 3.1E-01     |

| Table SI-9: Results of Sediment Simulations |                           |         |         |                                     |         |
|---------------------------------------------|---------------------------|---------|---------|-------------------------------------|---------|
| Sediment Type                               |                           | Anoxic  |         | Anoxic<br>(using Cu <sub>2</sub> S) | Oxic    |
| AVS, $\mu\text{mol/g}$                      |                           | 9.1     | 1       | 9.1                                 | 0       |
|                                             | $\mu\text{g/g}$           | 2.4E-19 | 2.4E-19 | 2.6E-20                             | 5.0E-07 |
| Inorganic Cu <sup>f</sup>                   | $\text{ng/L}_{\text{pw}}$ | 2.7E-12 | 2.7E-12 | 2.1E-07                             | 4.2E+00 |
|                                             | $\mu\text{g/g}$           | 4.4E-18 | 4.4E-18 | 3.4E-13                             | 6.7E-06 |
| Cu-DOC                                      | $\text{ng/L}_{\text{pw}}$ | 7.0E-10 | 7.0E-10 | 7.8E-11                             | 2.0E+03 |
|                                             | $\mu\text{g/g}$           | 1.1E-15 | 1.1E-15 | 1.2E-16                             | 3.2E-03 |
| Cu-POC                                      | $\mu\text{g/g}$           | 1.7E-12 | 1.7E-12 | 1.9E-13                             | 6.6E+00 |
| Cu-HO&C <sup>g</sup>                        | $\mu\text{g/g}$           | 0       | 0       | 0                                   | 0       |
| Cu-Sulfide                                  | $\mu\text{g/g}$           | 6.9     | 6.9     | 6.9                                 | 0       |
| Cu-HFO                                      | $\mu\text{g/g}$           | 9.9E-23 | 9.9E-23 | 1.1E-23                             | 3.0E-01 |
| Cu-HMO                                      | $\mu\text{g/g}$           | 6.8E-24 | 6.8E-24 | 7.5E-25                             | 2.5E-02 |
| Dissolved Cu                                | $\text{ng/L}_{\text{pw}}$ | 7.1E-10 | 7.1E-10 | 2.1E-07                             | 2.0E+03 |
|                                             | $\mu\text{g/g}$           | 1.1E-15 | 1.1E-15 | 3.4E-13                             | 3.2E-03 |
| Particulate Cu                              | $\mu\text{g/g}$           | 6.93    | 6.93    | 6.93                                | 6.93    |
| Sediment log $K_D$                          | --- <sup>h</sup>          | 16.0    | 16.0    | 13.5                                | 3.53    |

- a These refer to the period in the simulation from day 24 to day 365. The log  $K_D$  values quoted are arithmetic averages for this time period
- b Units of water column  $K_D$  are L/kg
- c This number is the diffusive flux integrated over the entire simulation time. Negative diffusive flux values are *directed out of the sediment* and positive diffusive flux values are *directed into the sediment*.
- d Speciation data was taken from day 20 of the simulation
- e pw = porewater
- f Inorganic copper is the sum of the inorganic copper complexes (e.g., with hydroxide, chloride and carbonate)
- g Copper (hydr)oxide and copper carbonate precipitates
- h Units of sediment  $K_D$  are  $\text{L}_{\text{pw}}/\text{kg}$
- i This quantity is the ratio of the total Cu concentration representing 70% removal ( $0.3 \times C_T(0)$ ) to the maximum total concentration during the quasi-steady-state period (Max QSS  $C_T$ ). This is meant to give an indication of where sustained water column concentrations lie relative to the 70% removal benchmark.

215

216 A series of sensitivity analyses were conducted to assess effect of (i) low AVS (1  $\mu\text{mol/g}$  versus the base

217 case value of 9.1  $\mu\text{mol/g}$ ), (ii) variation in water column/sediment pH (6/7, 7/7, and 8/7.5 versus the base

218 case combination of 7.07/7.56), (iii) low sediment solids concentration (150  $\text{g/L}_{\text{bulk}}$  versus the base case

219 value of 500  $\text{g/L}_{\text{bulk}}$ ), (iv) variation in hardness (factor of 2 about the base value of 516  $\text{mg/L}$  as  $\text{CaCO}_3$ ),

220 (v) variation in resuspension rate (0.1, 1, 3.2, and 10 times the default rate of 2.44  $\text{cm/yr}$ ), and (vi) variation

221 in copper loading (initial copper concentrations of 10, 100, and 1000  $\mu\text{g/L}$ ).

222 Model results from the anoxic simulation with AVS of 1  $\mu\text{mol/g}$  were identical to those with an AVS of

223 9.1 (Table SI-9). This is because AVS was present in excess of the total sediment copper concentration.

224 Simulations associated with items (ii) - (iv) use an anoxic simulation with  $\text{Cu}_2\text{S}(\text{s})$  and total initial copper  
225 of  $100 \mu\text{g/L}$ . Detailed results can be found in Table SI-10. For the relative pH variation sensitivity analysis,  
226 the largest change in time required to achieve 70% removal of total copper was for the 8/7.5 simulation;  
227 the predicted increase in removal time was from 3.5 days to 3.9 days. Variation of pH water column /  
228 sediment pH values had a relatively minor impact on the magnitude of the pseudo steady-state water column  
229 copper concentrations (Table SI-10). Total copper concentrations at the start of pseudo steady state were  
230 within 10% of the base case. Dissolved concentrations from the pH 8/7.5 simulation were slightly higher  
231 than the base case (i.e., 7.07/7.56). However, the total copper concentrations at the start of pseudo state-  
232 state conditions were at least 60 times smaller than the concentration representing 70% removal. The mass  
233 balance results were similar to the base case. In all pH variation runs, particulate copper speciation in the  
234 sediment was dominated by the formation of  $\text{Cu}_2\text{S}(\text{s})$ . Removal time, pseudo steady-state water column  
235 copper concentrations, and mass balance results showed no sensitivity to a factor of 2 variation in sediment  
236 hardness. Though the simulations with the decreased sediment solid concentration showed some departures  
237 from the base case values for pseudo steady-state water column copper concentrations as well as settling  
238 and resuspension fluxes, key outcomes remain similar to the base case. The 70% removal time was still  
239 around 3.5 days, the total copper concentrations at the start of pseudo state-state conditions was still  
240 significantly smaller than the concentration representing 70% removal, the integrated diffusive flux was  
241 directed into the sediment and particulate copper speciation in the sediment was dominated by the formation  
242 of  $\text{Cu}_2\text{S}(\text{s})$ .

243 Simulations associated with item (v) used an anoxic simulation with  $\text{AVS} = 9.1 \mu\text{mol/g}$ ,  $\text{CuS}(\text{s})$ , and total  
244 initial copper of  $35 \mu\text{g/L}$ . Model runs with the sediment resuspension rate set at 0.1, 1, 3.2, and 10 times  
245 the default rate (item v) were made to examine the impact of resuspension on water column copper  
246 concentrations in more detail. The resuspension rate was multiplied by factors of 0.1, 3.2, and 10 keeping  
247 the settling velocity and burial rate constant. The total and dissolved copper concentration in the water  
248 column at day 15 increased as the resuspension rate increased (Figure SI-3). However, even at the highest

249 resuspension rate (i.e., 10 times the default value), total and dissolved copper in the water remained more  
250 than 6 times lower than the concentration representing 70% removal of 10.5  $\mu\text{g/L}$ .

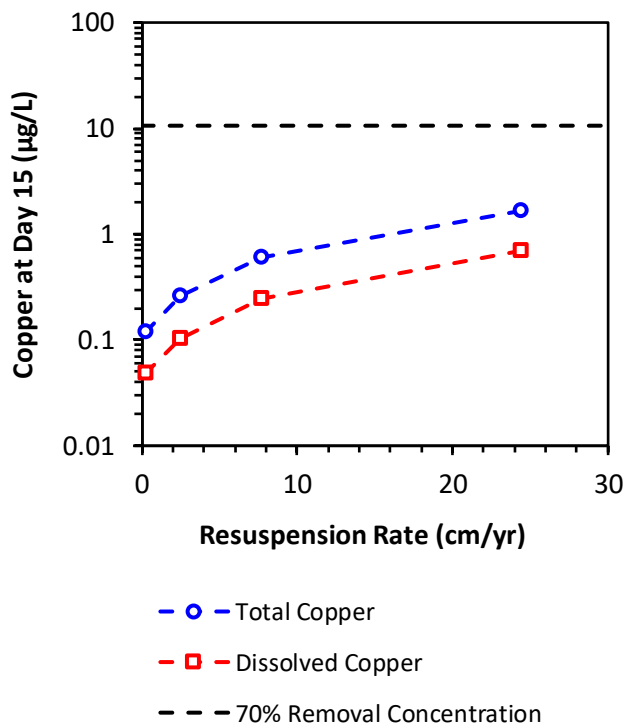

**Figure SI-3:** Effect of resuspension rate on total and dissolved copper concentration at day 15.

251  
252 Simulations associated with items (vi) used an anoxic simulation with  $\text{AVS} = 9.1 \mu\text{mol/g}$  and  $\text{CuS(s)}$ . The  
253 results indicate that total dissolved pseudo steady-state copper concentration and mass flux/balance values  
254 (except the diffusive flux) varied linearly with the initial copper concentration (Table SI-11). For the  
255 sensitivity analysis simulation with initial copper concentration at  $1,000 \mu\text{g/L}$  and an  $\text{AVS}$  of  $1 \mu\text{mol/g}$ , the  
256 capacity of the sediment to bind copper as  $\text{CuS(s)}$  was exceeded. Sediment copper in excess of  $\text{AVS}$  was  
257 bound by  $\text{POC}$ . This results in a decreased sediment  $K_D$ , increased pore water copper concentration and an  
258 integrated diffusive flux directed out of the sediment. However, this change in sediment speciation does  
259 not impact the amount of time required for 70% removal in the water column nor does it influence the  
260 pseudo steady-state concentration to an appreciable extent (compare last two columns in Table SI-11). The

261 copper loading sensitivity analysis simulations show 70% removal times that are less than 6 days and  
262 pseudo steady state water column total copper concentrations that are more than 50 times lower than that  
263 representing 70% removal.

264 Empirical  $K_D$  sediment simulations indicate total and dissolved copper concentrations at the onset of pseudo  
265 steady-state conditions of 0.31 and 0.21  $\mu\text{g/L}$ , respectively, which are more than 30 times lower than the  
266 70% removal concentration of 10.5  $\mu\text{g/L}$ . Although the water column  $\log K_D$  was greater than the sediment  
267  $\log K_D$ , the integrated diffusive flux was directed into the sediment.

268

**Table SI-10: Results of Copper Sediment Sensitivity Analysis Runs**

| Removal Approach and Output Quantity                     | Sensitivity Analysis Run |                             |                             |                               |                 |                 |                                              |
|----------------------------------------------------------|--------------------------|-----------------------------|-----------------------------|-------------------------------|-----------------|-----------------|----------------------------------------------|
|                                                          | Base Case <sup>a</sup>   | WC pH = 6.094<br>Sed pH = 7 | WC pH = 7.073<br>Sed pH = 7 | WC pH = 8.002<br>Sed pH = 7.5 | Hardness<br>× 2 | Hardness<br>÷ 2 | Sediment solids<br>= 150 g/L <sub>bulk</sub> |
| Tot. Cu Range, µg/L <sup>b</sup>                         | 0.400 – 0.450            | 0.440 – 0.490               | 0.410 – 0.450               | 0.420 – 0.470                 | 0.400 – 0.450   | 0.400 – 0.450   | 1.50 – 1.70                                  |
| Diss. Cu Range, µg/L <sup>b</sup>                        | 0.160 – 0.180            | 0.200 – 0.220               | 0.160 – 0.180               | 0.180 – 0.200                 | 0.160 – 0.180   | 0.160 – 0.180   | 0.630 – 0.710                                |
| Mass in the Water Column, %                              | 0.40                     | 0.44                        | 0.41                        | 0.42                          | 0.40            | 0.40            | 1.50                                         |
| Mass in the Sediment, %                                  | 90.2                     | 90.1                        | 90.2                        | 90.2                          | 90.2            | 90.2            | 89.2                                         |
| Total Settling IN, %                                     | 176                      | 176                         | 176                         | 176                           | 176             | 176             | 372                                          |
| Total Resusp. OUT, %                                     | 76.6                     | 76.6                        | 76.6                        | 76.5                          | 76.6            | 76.6            | 273.7                                        |
| Total Diffusion NET, % <sup>c</sup>                      | 0.143                    | 0.152                       | 0.143                       | 0.174                         | 0.143           | 0.143           | 0.287                                        |
| Total Burial OUT, %                                      | 9.42                     | 9.41                        | 9.42                        | 9.41                          | 9.42            | 9.42            | 9.31                                         |
| Water column log $K_D$ , L/kg <sup>b</sup>               | 4.99                     | 4.91                        | 4.99                        | 4.94                          | 4.99            | 4.99            | 4.95                                         |
| Sediment log $K_D$ , L/kg <sup>b</sup>                   | 14.0                     | 14.0                        | 14.0                        | 14.0                          | 14.0            | 14.0            | 14.5                                         |
| Time for 70% Removal of Total Copper, days               | 3.5                      | 3.5                         | 3.5                         | 3.9                           | 3.5             | 3.5             | 3.6                                          |
| $[0.3 \times C_T(0)] / \text{Max QSS } C_T$ <sup>d</sup> | 66                       | 62                          | 66                          | 63                            | 66              | 66              | 18                                           |

<sup>a</sup> Base-case simulation parameters: water column pH 7.07; sediment pH 7.56; anoxic sediment with AVS = 1 µmol/g, settling velocity 2.5 m/d; initial Cu concentration = 0.1 mg/L; Cu<sub>2</sub>S is the potential copper sulfide precipitate

<sup>b</sup> Ranges and average are based on data from the quasi-steady state period of the simulation.

<sup>c</sup> This number is the diffusive flux integrated over the *entire* 365-day simulation. Negative diffusive flux values are directed out of the sediment and positive diffusive flux values are directed into the sediment.

<sup>d</sup> This quantity is the ratio of the total Cu concentration representing 70% removal ( $0.3 \times C_T(0)$ ) to the maximum total concentration during the quasi-steady-state period (Max QSS  $C_T$ ). This is meant to give an indication of where sustained water column concentrations lie relative to the 70% removal benchmark.

| <b>Table SI-11: Results of Copper Loading Sediment Sensitivity Analysis Simulations</b> |                                 |            |          |            |           |               |               |
|-----------------------------------------------------------------------------------------|---------------------------------|------------|----------|------------|-----------|---------------|---------------|
| <b>Initial Total Copper, µg/L</b>                                                       |                                 | <b>10</b>  |          | <b>100</b> |           | <b>1000</b>   |               |
| <b>AVS, µmol/g</b>                                                                      |                                 | <b>9.1</b> | <b>1</b> | <b>9.1</b> | <b>1</b>  | <b>9.1</b>    | <b>1</b>      |
| <b>Water Column Removal Data</b>                                                        |                                 |            |          |            |           |               |               |
| Time for 70% Removal                                                                    | days                            | 3.2        | 3.2      | 3.5        | 3.5       | 6.0           | 6.0           |
| $[0.3 \times C_T(0)] / \text{Max QSS } C_T^i$                                           |                                 | 68         | 68       | 66         | 66        | 61            | 60            |
| <b>Pseudo Steady-State Water Column Copper Concentrations</b>                           |                                 |            |          |            |           |               |               |
| Tot. Cu Range <sup>a</sup>                                                              | ng/L                            | 40 - 44    | 40 - 44  | 400 - 450  | 400 - 450 | 4,400 - 4,900 | 4,500 - 5000  |
| Diss. Cu Range <sup>a</sup>                                                             | ng/L                            | 16 - 18    | 16 - 18  | 160 - 180  | 160 - 180 | 2,000 - 2,200 | 2,000 - 2,300 |
| Water column log $K_D$ <sup>a</sup>                                                     | ---                             | 5.01       | 5.01     | 4.99       | 4.99      | 4.91          | 4.91          |
| <b>Mass Balance at 1 Year</b>                                                           |                                 |            |          |            |           |               |               |
| Mass in the Water Column                                                                | %                               | 0.40       | 0.40     | 0.40       | 0.40      | 0.44          | 0.45          |
| Mass in the Sediment                                                                    | %                               | 90.2       | 90.2     | 90.2       | 90.2      | 90.2          | 90.2          |
| Total Settling IN                                                                       | %                               | 176        | 176      | 176        | 176       | 175           | 177           |
| Total Resusp. OUT                                                                       | %                               | 76.6       | 76.6     | 76.6       | 76.6      | 76.2          | 76.2          |
| Total Burial OUT                                                                        | %                               | 9.42       | 9.42     | 9.42       | 9.42      | 9.37          | 9.36          |
| Total Diffusion NET <sup>c</sup>                                                        | %                               | 0.124      | 0.124    | 0.143      | 0.143     | 0.297         | -1.151        |
| <b>Sediment Speciation Data <sup>d</sup></b>                                            |                                 |            |          |            |           |               |               |
| Total Sediment Cu                                                                       | µg/g                            | 2.0        | 2.0      | 20         | 20        | 198           | 198           |
|                                                                                         | µmol/g                          | 0.03       | 0.03     | 0.31       | 0.31      | 3.1           | 3.1           |
| “Free” Cu <sup>2+</sup>                                                                 | ng/L <sub>pw</sub> <sup>e</sup> | 1.5E-13    | 1.5E-13  | 1.5E-13    | 1.5E-13   | 1.5E-13       | 6.1E+01       |
|                                                                                         | µg/g                            | 2.4E-19    | 2.4E-19  | 2.4E-19    | 2.4E-19   | 2.4E-19       | 9.8E-05       |
| Inorganic Cu <sup>f</sup>                                                               | ng/L <sub>pw</sub>              | 2.7E-12    | 2.7E-12  | 2.7E-12    | 2.7E-12   | 2.7E-12       | 1.1E+03       |
|                                                                                         | µg/g                            | 4.4E-18    | 4.4E-18  | 4.4E-18    | 4.4E-18   | 4.4E-18       | 1.8E-03       |
| Cu-DOC                                                                                  | ng/L <sub>pw</sub>              | 7.0E-10    | 7.0E-10  | 7.0E-10    | 7.0E-10   | 7.0E-10       | 5.3E+04       |
|                                                                                         | µg/g                            | 1.1E-15    | 1.1E-15  | 1.1E-15    | 1.1E-15   | 1.1E-15       | 8.5E-02       |
| Cu-POC                                                                                  | µg/g                            | 1.7E-12    | 1.7E-12  | 1.7E-12    | 1.7E-12   | 1.7E-12       | 1.3E+02       |
| Cu-HO&C <sup>g</sup>                                                                    | µg/g                            | 0          | 0        | 0          | 0         | 0             | 0             |
| Cu-Sulfide                                                                              | µg/g                            | 2.0        | 2.0      | 19.8       | 19.8      | 197.7         | 63.5          |
| Cu-HFO                                                                                  | µg/g                            | 9.9E-23    | 9.9E-23  | 9.9E-23    | 9.9E-23   | 9.9E-23       | 3.8E-08       |
| Cu-HMO                                                                                  | µg/g                            | 6.8E-24    | 6.8E-24  | 6.8E-24    | 6.8E-24   | 6.8E-24       | 1.6E-09       |
| Dissolved Cu                                                                            | ng/L <sub>pw</sub>              | 7.1E-10    | 7.1E-10  | 7.1E-10    | 7.1E-10   | 7.1E-10       | 5.5E+04       |
|                                                                                         | µg/g                            | 1.1E-15    | 1.1E-15  | 1.1E-15    | 1.1E-15   | 1.1E-15       | 8.7E-02       |
| Particulate Cu                                                                          | µg/g                            | 2.0        | 2.0      | 20         | 20        | 198           | 198           |
| Sediment log $K_D$                                                                      | ---                             | 15.4       | 15.4     | 16.4       | 16.4      | 17.4          | 3.56          |

<sup>a</sup> These refer to the period in the simulation from day 24 to day 365. The log  $K_D$  values quoted are arithmetic averages for this time period

<sup>b</sup> Units of water column  $K_D$  are L/kg

<sup>c</sup> This number is the diffusive flux integrated over the entire simulation time. Negative diffusive flux values are directed out of the sediment and positive diffusive flux values are directed into the sediment.

<sup>d</sup> Speciation data was taken from day 20 of the simulation

<sup>e</sup> pw = pore water

<sup>f</sup> Inorganic copper is the sum of the inorganic copper complexes (e.g., with hydroxide, chloride and carbonate)

<sup>g</sup> Copper (hydr)oxide and copper carbonate precipitates

<sup>h</sup> Units of sediment  $K_D$  are L<sub>pw</sub>/kg



- i This quantity is the ratio of the total Cu concentration representing 70% removal ( $0.3 \times C_T(0)$ ) to the maximum total concentration during the quasi-steady-state period (Max QSS  $C_T$ ). This is meant to give an indication of where sustained water column concentrations lie relative to the 70% removal benchmark.

272 **DETAILS OF SAINT GERMAIN LES BELLES RESERVOIR TICKET-UWM SIMULATIONS**

273 *Parameter Selection*

274 Where possible, physical and chemical parameters serving as input for the TICKET-UWM were specified  
275 based on direct measurements provided in (van Hullebusch et al., 2003a; van Hullebusch et al., 2003b)  
276 (Table SI-12). Since settling rate, burial rate, and sediment solids concentration were not measured for  
277 the reservoir, these parameters were set to regional values from the EUSES model lake (EC, 2004;  
278 European Chemicals Agency, 2010) (Table SI-12). The resuspension rate was calculated based on a  
279 solids balance and assuming the solids in the system are at steady-state.

280

281

282

283

284

285

286

287

288

289

290

291

**Table SI-12: TICKET-UWM Input for the Saint Germain les Belles Reservoir Simulations<sup>a</sup>**

| Parameter                                  | Value                                           |
|--------------------------------------------|-------------------------------------------------|
|                                            | Saint Germain les Belles Reservoir <sup>a</sup> |
| Volume, m <sup>3</sup>                     | 6.5 × 10 <sup>4</sup>                           |
| Surface area, km <sup>2</sup>              | 0.04                                            |
| Average water depth, m                     | 1.6                                             |
| Residence time, yr                         | 0.25                                            |
| Settling rate, m/d                         | Calibrated                                      |
| Burial rate, cm/yr                         | 0.3 <sup>b</sup>                                |
| Resuspension rate, cm/yr                   | 2.75 <sup>c</sup>                               |
| Diffusive exchange, cm/day                 | 0.24 <sup>b,d</sup>                             |
| Sediment <i>f<sub>oc</sub></i>             | 0.073                                           |
| Sediment solids conc., g/L <sub>bulk</sub> | 500 <sup>b</sup>                                |
| Depth of active sediment, cm               | 5                                               |
| AVS, μmol/g <sub>dry</sub>                 | 8.8 <sup>e</sup>                                |
| Sediment HFO, mg/kg                        | 0 (anoxic sediment)                             |
| Sediment HMO, mg/kg                        | 0 (anoxic sediment)                             |
| Initial Cu conc., μg/L as Cu               | 197 <sup>f</sup>                                |
| Initial Sed Cu conc., μg/g                 | 37.7                                            |
| Suspended solids, mg/L                     | 18.0                                            |
| Suspended solids <i>f<sub>oc</sub></i>     | 0.1 <sup>b</sup>                                |
| POC, mg/L                                  | 1.80                                            |
| DOC, mg/L                                  | 5.1                                             |
| Water column pH                            | 8.4                                             |
| Sediment pH                                | 7.5                                             |
| Alkalinity, mg/L as CaCO <sub>3</sub>      | 49.0                                            |
| Calcium, mg/L                              | 3.4                                             |
| Magnesium, mg/L                            | 3.6                                             |
| Sodium, mg/L                               | 5.1                                             |
| Potassium, mg/L                            | 1.3                                             |
| Sulfate, mg/L as SO <sub>4</sub>           | 4.7                                             |
| Chloride, mg/L                             | 7.5                                             |

<sup>a</sup> Unless otherwise noted, input parameter are taken (or estimated) from (van Hullebusch et al., 2003a; van Hullebusch et al., 2003b)

<sup>b</sup> Data from EUSES model lake (EC, 2004; European Chemicals Agency, 2010). Surface area and volume values quoted refer to a regional scale assessment. They do not influence the removal simulations.

<sup>c</sup> Calculated using the settling velocity, suspended solids concentration, sediment bulk solid concentration, and the burial (net sedimentation) rate shown in the table using a steady-state solids balance (Chapra, 1997).

<sup>d</sup> EUSES pore water side mass transfer coefficient. Mass transfer resistance is assumed to be all on the sediment side (Di Toro et al., 1981).

<sup>e</sup> 50<sup>th</sup> percentile AVS concentration for a Flemish dataset (Vangheluwe et al., 2005)

<sup>f</sup> This was calculated by adding the theoretical dose value to the measured pre-dose background copper concentration of 1.28 μg/L.

295 *Distribution Coefficients - Empirical  $K_D$*

296 According to measured total and dissolved copper and suspended particulate matter (SPM) concentrations  
297 in the reservoir, log  $K_D$  values spanned the range 3.66 to 4.87 (i.e.,  $K_D = 10^{3.66}$  to  $10^{4.87}$  L/kg). The Empirical  
298  $K_D$  simulation used the average log  $K_D$  value of 4.56. Based on the average SPM concentration over the  
299 study period of 18.0 mg/L, the average fraction particulate was 0.39. The distribution coefficient in the  
300 sediment of the reservoir was not measured. Therefore, for the Empirical  $K_D$  simulation the sediment log  
301  $K_D$  was set at 4.39 based upon the copper partition coefficient review of Heijerick and Van Sprang (2005).

302 *Distribution Coefficients - Calculated  $K_D$*

303 WHAM VII (Tipping et al., 2011) was used to calculate copper  $K_D$  values based on pH, DOC, cations,  
304 anions, and the concentration of POC, HFO, HFO, and HMO *at each time step in the simulation*. This  
305 method accounts for non-linear partitioning behavior associated with changes in total copper  
306 concentration in the water column as well as competition between copper, protons and hardness cations  
307 (Ca and Mg) for binding sites. The concentrations of particulate and colloidal HA and FA were  
308 calculated from POM and DOC as follows: For both particulate organic matter (POM) and dissolved  
309 organic matter (DOM),  $f_{OC} = 0.58$  g org C/g OM (van Hullebusch et al., 2003a; van Hullebusch et al.,  
310 2003b); POM is 100% active with 50% HA and 50% FA (Lofts and Tipping, 2000); DOM is 63.5%  
311 active with 0% HA and 100% FA (Bryan et al., 2002; Lofts and Tipping, 2011).

312 Concentrations of HFO and HMO in the water column were estimated from measured total sediment  
313 particulate iron and manganese concentrations (Saint Germain les Belles Reservoir), and the water column  
314 suspended solids concentrations for the reservoir (Table SI-12). The following specifications were used to  
315 determine the amount of HFO and HMO from measured total iron and manganese, respectively.

- 316 • Approximately 40% and 18% of the total particulate iron and manganese in the water column were  
317 specified to be HFO and HMO, respectively (HydroQual and Manhattan College, 2010)
- 318 • HFO-iron was assigned a formula weight of 89 g HFO/mol Fe (Dzombak and Morel, 1990)

319 • HMO-manganese Mn was assigned a formula weight of 119 g HMO/mol Mn (Tonkin et al., 2004).

320 The AVS of the sediment in the reservoir was not measured, so it was set at the 50<sup>th</sup> percentile AVS value  
321 of 8.8  $\mu\text{mol/g}$  dry weight from Vangheluwe et al. (2005).

322

## REMOVAL OF COPPER FROM THE WATER COLUMN

**Table SI-13: Parameters Used for Summary of Copper Removal from the Water Column**

| ID                       | m      | $v_s$ | S                     | H    | log $K_D$ | H/S                  | $t_{30}$ |
|--------------------------|--------|-------|-----------------------|------|-----------|----------------------|----------|
|                          | (mg/L) | (m/d) | (g/m <sup>2</sup> /d) | (m)  |           | (m <sup>3</sup> d/g) | (days)   |
| Lake Courtille           | 6.94   | 0.750 | 5.21                  | 1.77 | 4.44      | 0.340                | 15.6     |
| St. Germain les Belles   | 18.0   | 0.680 | 12.2                  | 1.60 | 4.78      | 0.131                | 7.06     |
| IME Mesocosms            | 2.89   | 0.675 | 1.95                  | 0.76 | 5.36      | 0.390                | 4.65     |
| MELIMEX                  | 5.91   | 0.200 | 1.18                  | 10.0 | 4.12      | 8.46                 | 132      |
| Novosibirskoye Reservoir | 15.0   | 0.184 | 2.76                  | 3.00 | 5.07      | 1.09                 | 10.5     |
| TICKET-UWM (Emp Kd)      | 15.0   | 2.50  | 37.5                  | 3.00 | 4.48      | 0.0800               | 4.72     |
| TICKET-UWM (Calc Kd)     | 15.0   | 2.50  | 37.5                  | 3.00 | 4.90      | 0.0800               | 2.75     |

Averages (from highlighted cells):  $m = 10.5 \text{ mg/L}$ ;  $K_D = 10^{4.78} \text{ L/kg}$

### Summary of Schäfers C. 2001. Community level study with copper in aquatic microcosms.

#### Schmallenberg, Germany: Fraunhofer Institute for Molecular Biology and Applied Ecology (IME).

- A study sponsored by the International Copper Association (ICA) represented by European Copper Institute (ECI) was performed at the Fraunhofer Institut for Molecular Biology and Applied Ecology to evaluate effects of a permanent copper sulphate exposure to an aquatic community in indoor microcosms (Schäfers, 2001). Water and sediment were taken from a reference site within the Euro-Ecole project. The study included all important community elements (phyto and zooplankton, macrophytes, benthic invertebrates), which were observed for an exposure period of about 3 months. Copper was tested at permanent nominal concentrations of 5, 10, 20, 40, 80, and 160 µg/L, which were maintained by three treatments weekly.
- The averaged added copper concentrations measured one day after treatment were in the range of 70 – 90 % of the respective nominal concentrations. Within the two or three days between treatments, the dissipation of total copper from the water column was about 25%.

- The exposure period covering spring/early summer up to autumn conditions and the oligotrophic conditions as well as the low hardness and DOC values of the used water can be regarded as a worse case scenario for assessing biological effects.
- Actual primary production of the systems, dominated by macrophytes and indicated by water parameters pH and oxygen content, showed distinctly less increase in spring/early summer at nominal copper concentrations higher than 10 µg/L. At the end of the study, biomass of macrophytes was significantly lower than controls at 40 µg/L (NOEC = 20 µg/L).
- Phytoplankton in total showed higher densities compared to controls at treatments of 20 µg/L and higher (NOEC = 10 µg/L), mainly caused by picoplankton and green algae. Some taxa (Diatomea and Cryptophyta) temporarily showed slightly lower abundances at the same concentrations.
- *Daphnia longispina* and Phyllozoa in general were identified as the most sensitive zooplankton taxa with a NOEC of 20 µg/L. Copepoda and Rotatoria seemed not to be affected or only at the highest treatment level.
- No effects could be detected for benthic macroinvertebrates neither in sediment toxicity tests with microcosm sediments after study termination.
- In total, added copper concentration up to 20 µg/L showed no relevant direct effects on structural endpoints and only slight and temporary effects on functional endpoints represented by oxygen concentrations and pH values. The No Observed Ecologically Adverse Effect Concentration (NOEAEC) of the study can be derived with 20 µg/L, and can be regarded as representative of plankton-dominated waters.

#### *Dissolved Copper Measurements*

Dissolved copper measurements were made using anodic stripping voltammetry (ASV) with a Metrohm hanging mercury drop electrode interfaced with a Metrohm 757 Computrace, with a Metrohm Dosimat attached in order to provide accurate automated additions of copper standard. Table SI-14 below contains the dissolved copper results used in present study.

**Table SI-14. Dissolved Copper Measurements**

| <b>Microcosm</b>  | <b>Time after 1st treatment</b> | <b>Dissolved Copper, µg/L</b> |
|-------------------|---------------------------------|-------------------------------|
| Control (pooled)  | 1h                              | 1.7                           |
| Control (pooled)  | 24h                             | 2.3                           |
| Control (pooled)  | 48h                             | 2.7                           |
| No. 25 (5 µg/L)   | 1h                              | 6.2                           |
| No. 25 (5 µg/L)   | 24h                             | 6.4                           |
| No. 25 (5 µg/L)   | 48h                             | 5.5                           |
| No. 30 (5 µg/L)   | 1h                              | 8.8                           |
| No. 30 (5 µg/L)   | 24h                             | 6.7                           |
| No. 30 (5 µg/L)   | 48h                             | 6.2                           |
| No. 21 (10 µg/L)  | 1h                              | 16.7                          |
| No. 21 (10 µg/L)  | 24h                             | 9.4                           |
| No. 21 (10 µg/L)  | 48h                             | 10                            |
| No. 33 (10 µg/L)  | 1h                              | 15.6                          |
| No. 33 (10 µg/L)  | 24h                             | 9.8                           |
| No. 33 (10 µg/L)  | 48h                             | 9                             |
| No. 27 (20 µg/L)  | 1h                              | 21.3                          |
| No. 27 (20 µg/L)  | 24h                             | 14.5                          |
| No. 27 (20 µg/L)  | 48h                             | 13.9                          |
| No. 34 (20 µg/L)  | 1h                              | 15.2                          |
| No. 34 (20 µg/L)  | 24h                             | 17.4                          |
| No. 34 (20 µg/L)  | 48h                             | -                             |
| No. 24 (40 µg/L)  | 1h                              | 38.4                          |
| No. 24 (40 µg/L)  | 24h                             | 32.4                          |
| No. 24 (40 µg/L)  | 48h                             | 25.1                          |
| No. 36 (40 µg/L)  | 1h                              | 41.5                          |
| No. 36 (40 µg/L)  | 24h                             | 33.8                          |
| No. 36 (40 µg/L)  | 48h                             | 31.3                          |
| No. 26 (80 µg/L)  | 1h                              | 67.2                          |
| No. 26 (80 µg/L)  | 24h                             | 41.2                          |
| No. 26 (80 µg/L)  | 48h                             | 41                            |
| No. 35 (80 µg/L)  | 1h                              | 58.6                          |
| No. 35 (80 µg/L)  | 24h                             | 40.6                          |
| No. 35 (80 µg/L)  | 48h                             | 48.6                          |
| No. 23 (160 µg/L) | 1h                              | 151.9                         |
| No. 23 (160 µg/L) | 24h                             | 63.8                          |
| No. 23 (160 µg/L) | 48h                             | 57.7                          |
| No. 31 (160 µg/L) | 1h                              | 142                           |
| No. 31 (160 µg/L) | 24h                             | 70.9                          |
| No. 31 (160 µg/L) | 48h                             | 55.6                          |



### *Total Copper Measurements*

Total copper measurements were made following the international standard method ISO 11885 / DEV E22. A Liberty II ICP-OES from Varian (Eschborn) was used. Table SI-15 below contains the copper results used in present study.

**Table SI-15 Total Copper Measurements**

| <b>Microcosm</b>               | <b>Total Copper, <math>\mu\text{g/L}</math></b> |
|--------------------------------|-------------------------------------------------|
| B32 control 1                  | <i>3.4</i>                                      |
| B29 control 2                  | <i>3.9</i>                                      |
| B22 control 3                  | <i>5.3</i>                                      |
| B28 control 4                  | <b>10</b>                                       |
| B25 5 $\mu\text{g/L}$          | <b>11.9</b>                                     |
| B30 5 $\mu\text{g/L}$          | <b>14.2</b>                                     |
| B21 10 $\mu\text{g/L}$         | <b>19.7</b>                                     |
| B33 10 $\mu\text{g/L}$         | <b>21.7</b>                                     |
| B27 20 $\mu\text{g/L}$         | <b>22.7</b>                                     |
| B34 20 $\mu\text{g/L}$         | <b>36.1</b>                                     |
| B24 40 $\mu\text{g/L}$         | <b>40</b>                                       |
| B36 40 $\mu\text{g/L}$         | <b>54.1</b>                                     |
| B26 80 $\mu\text{g/L}$         | <b>58.3</b>                                     |
| B35 80 $\mu\text{g/L}$         | <b>65.7</b>                                     |
| B23 160 $\mu\text{g/L}$        | <b>114</b>                                      |
| B31 160 $\mu\text{g/L}$        | <b>130</b>                                      |
| TM28 (6.3 $\mu\text{g/L Cu}$ ) | <i>6.3</i>                                      |
| Limit of determination         | <b>8.9</b>                                      |

Italics: data below limit of determination (only for information; bold: valid data within working range.  
Sampling date is 2/22/2001

## REFERENCES

- AMINAL/AWZ, 1995. Methodological study on the inventory, the ecological effects and remediation of sediments of Flemish watercourses (in Dutch), Final report, p. 209.
- ARCHE, 2013. Unit World Model - Overview of available data on relevant environmental parameters, Gent, Belgium.
- Besser, J.M., Brumbaugh, W.G., Kemble, N.E., Ivey, C.D., Kunz, J.L., Ingersoll, C.G., Rudel, D., 2011. Toxicity of nickel-spiked freshwater sediments to benthic invertebrates—Spiking methodology, species sensitivity, and nickel bioavailability. U.S. Geological Survey, Reston, Virginia.
- Bryan, S.E., Tipping, E., Hamilton-Taylor, J., 2002. Comparison of measured and modelled copper binding by natural organic matter in freshwaters. *Comparative Biochemistry and Physiology Part C: Toxicology & Pharmacology* 133, 37-49.
- Canavan, R.W., Van Cappellen, P., Zwolsman, J.J.G., van den Berg, G.A., Slomp, C.P., 2007. Geochemistry of trace metals in a fresh water sediment: Field results and diagenetic modeling. *Science of The Total Environment* 381, 263-279.
- Chapra, S.C., 1997. *Surface Water-Quality Modeling*. McGraw-Hill, New York.
- de Deckere, E., De Cooman, W., Florus, M., Meire, P., 2000. Characterization of sediments in Flanders. Monitoring reports navigable watercourses 1999-2000., UIA, Biology Department/AMINAL division water.
- Di Toro, D.M., Allen, H.E., Bergman, H.L., Meyer, J.S., Paquin, P.R., Santore, R.C., 2001. Biotic ligand model of the acute toxicity of metals. 1. Technical Basis. *Environ. Toxicol. Chem.* 20, 2383-2396.
- Di Toro, D.M., McGrath, J.A., Hansen, D.J., Berry, W.J., Paquin, P.R., Mathew, R., Wu, K.B., Santore, R.C., 2005. Predicting sediment metal toxicity using a sediment biotic ligand model: Methodology and initial application. *Environ. Toxicol. Chem.* 24, 2410-2427.
- Di Toro, D.M., O'Connor, D.J., Thomann, R.V., St. John, J.P., 1981. *Analysis of Fate of Chemicals in Receiving Waters, Phase 1*. Chemical Manufacturers Association, Washington, DC. Prepared by HydroQual, Inc., Mahwah, NJ.
- Diamond, M.L., Mackay, D., Cornett, R.J., Chant, L.A., 1990. A model of the exchange of inorganic chemicals between water and sediments. *Environ. Sci. Technol.* 24, 713-722.
- Dyrssen, D., Kremling, K., 1990. Increasing hydrogen sulfide concentration and trace metal behavior in the anoxic Baltic waters. *Marine Chemistry* 30, 193-204.
- Dzombak, D.A., Morel, F.M.M., 1990. *Surface complexation modeling : hydrous ferric oxide*. Wiley, New York.
- EC, 2004. European Union System for the Evaluation of Substances 2.0 (EUSES). Prepared for the European Chemicals Bureau by the National Institute of Public Health and the Environment (RIVM), Bilthoven, The Netherlands.
- EURAS, 2008. Acid Volatile Sulfide survey of large river sediments in the United Kingdom, Spain, and Finland in 2007 - Working Draft. Prepared for the Ecotoxicity Technical Advisory Panel.
- European Chemicals Agency, 2010. Chapter R.16: Environmental Exposure Estimation, Guidance on Information Requirements and Chemical Safety Assessment. European Chemicals Agency, Helsinki, Finland.
- Farley, K.J., Carbonaro, R.F., Di Toro, D.M., 2007. Unit World Model Tier 1 Hazard Ranking Model for Metals in Lakes. Manhattan College, Riverdale, New York.
- Farley, K.J., Carbonaro, R.F., Fanelli, C.J., Costanzo, R., Rader, K.J., Di Toro, D.M., 2011. TICKET-UWM: A coupled kinetic, equilibrium, and transport screening model for metals in lakes. *Environ. Toxicol. Chem.* 30, 1278-1287.
- Farley, K.J., Rader, K.J., Miller, B.E., 2008. Tableau Input Coupled Kinetic Equilibrium Transport (TICKET) Model. *Environ. Sci. Technol.* 42, 838-844.

- Gallon, C., Tessier, A., Gobeil, C., Alfaro-De La Torre, M.C., 2004. Modeling diagenesis of lead in sediments of a Canadian Shield lake. *Geochim. Cosmochim. Acta* 68, 3531-3545.
- Gee, A.K., Bruland, K.W., 2002. Tracing Ni, Cu, and Zn kinetics and equilibrium partitioning between dissolved and particulate phases in South San Francisco Bay, California, using stable isotopes and high-resolution inductively coupled plasma mass spectrometry. *Geochim. Cosmochim. Acta* 66, 3063-3083.
- Heijerick, D., Van Sprang, P., 2005. Appendix ENV F - Review of copper partitioning coefficients in the aquatic environment and processes causing the observed variation., Copper, Copper II Sulfphate, Pentahydrate, Copper(I)Oxide, Copper(II)Oxide, Dicopper Chloride Trihydroxide, pp. F1 - F40.
- Herzl, V.M.C., Millward, G.E., Wollast, R., Achterberg, E.P., 2003. Species of dissolved Cu and Ni and their adsorption kinetics in turbid riverwater. *Estuarine, Coastal and Shelf Science* 56, 43-52.
- Hunt, C.D., Smith, D.L., 1983. Remobilization of Metals from Polluted Marine Sediments. *Can. J. Fish. Aquat. Sci.* 40, s132-s142.
- HydroQual, Manhattan College, 2010. Development of Models for Metal Partitioning to Oxidic Sediments.
- Klinkhammer, G., Heggie, D.T., Graham, D.W., 1982. Metal diagenesis in oxic marine sediments. *Earth and Planetary Science Letters* 61, 211-219.
- Lofts, S., Tipping, E., 2000. Solid-solution metal partitioning in the Humber rivers: application of WHAM and SCAMP. *Science of The Total Environment* 251, 381-399.
- Lofts, S., Tipping, E., 2011. Assessing WHAM/Model VII against field measurements of free metal ion concentrations: model performance and the role of uncertainty in parameters and inputs. *Environmental Chemistry* 8, 501-516.
- Mackay, D., 1979. Finding fugacity feasible. *Environ. Sci. Technol.* 13, 1218-1223.
- Mackay, D., 1991. Multimedia environmental models : the fugacity approach. Lewis Publishers, Chelsea, Michigan.
- Mackay, D., Paterson, S., 1991. Evaluating the multimedia fate of organic chemicals: a level III fugacity model. *Environ. Sci. Technol.* 25, 427-436.
- Millward, G.E., Glegg, G.A., Morris, A.W., 1992. Zn and Cu removal kinetics in estuarine waters. *Estuarine, Coastal and Shelf Science* 35, 37-54.
- Santore, R.C., Di Toro, D.M., Paquin, P.R., Allen, H.E., Meyer, J.S., 2001. Biotic ligand model of the acute toxicity of metals. 2. Application to acute copper toxicity in freshwater fish and *Daphnia*. *Environ. Toxicol. Chem.* 20, 2397-2402.
- Schäfers, C., 2001. Community level study with copper in aquatic microcosms. Fraunhofer Institute for Molecular Biology and Applied Ecology (IME), Schmallenberg, Germany, p. 109.
- Schecher, W.D., McAvoy, D.C., 2003. MINEQL+: A Chemical Equilibrium Modeling System, Version 4.5 for Windows, User's Manual, Second ed. Environmental Research Software, Hallowell, Maine.
- Shaw, T.J., Gieskes, J.M., Jahnke, R.A., 1990. Early diagenesis in differing depositional environments: The response of transition metals in pore water. *Geochim. Cosmochim. Acta* 54, 1233-1246.
- Simpson, S.L., Rosner, J., Ellis, J., 2000. Competitive displacement reactions of cadmium, copper, and zinc added to a polluted, sulfidic estuarine sediment. *Environ. Toxicol. Chem.* 19, 1992-1999.
- Skeaff, J.M., Dubreuil, A.A., Brigham, S.I., 2002. The concept of persistence as applied to metals for aquatic hazard identification. *Environ. Toxicol. Chem.* 21, 2581-2590.
- Stumm, W., Morgan, J.J., 1996. Aquatic chemistry : chemical equilibria and rates in natural waters. Wiley, New York.
- Tipping, E., 1993. Modelling ion binding by humic acids. *Colloids and Surfaces A: Physicochemical and Engineering Aspects* 73, 117-131.
- Tipping, E., 1994. WHAM--a chemical equilibrium model and computer code for waters, sediments, and soils incorporating a discrete site/electrostatic model of ion-binding by humic substances. *Comput. Geosci.* 20, 973-1023.
- Tipping, E., 1998. Humic Ion-Binding Model VI: An Improved Description of the Interactions of Protons and Metal Ions with Humic Substances. *Aquat. Geochem.* 4, 3-47.

- Tipping, E., Hurley, M.A., 1992. A unifying model of cation binding by humic substances. *Geochim. Cosmochim. Acta* 56, 3627-3641.
- Tipping, E., Lofts, S., Sonke, J.E., 2011. Humic Ion-Binding Model VII: a revised parameterisation of cation-binding by humic substances. *Environmental Chemistry* 8, 225-235.
- Tonkin, J.W., Balistrieri, L.S., Murray, J.W., 2004. Modeling sorption of divalent metal cations on hydrous manganese oxide using the diffuse double layer model. *Appl. Geochem.* 19, 29-53.
- United Nations, 2017. Globally Harmonized System of Classification and Labelling of Chemicals (GHS), Seventh ed. United Nations, New York and Geneva.
- van den Berg, G.A., Loch, J.P.G., van der Heijdt, L.M., Zwolsman, J.J.G., 1999. Mobilisation of heavy metals in contaminated sediments in the river Meuse, The Netherlands. *Water Air Soil Pollut.* 116, 567-586.
- van Hullebusch, E., Chatenet, P., Deluchat, V., Chazal, P.M., Froissard, D., Botineau, M., Ghestem, A., Baudu, M., 2003a. Copper accumulation in a reservoir ecosystem following copper sulfate treatment (St. Germain Les Belles, France). *Water Air Soil Pollut.* 150, 3-22.
- van Hullebusch, E., Chatenet, P., Deluchat, V., Chazal, P.M., Froissard, D., Lens, P.N.L., Baudu, M., 2003b. Fate and forms of Cu in a reservoir ecosystem following copper sulfate treatment (Saint Germain les Belles, France). *Journal de Physique IV* 107, 1333-1336.
- Vangheluwe, M., Heijerick, D., Verdonck, F., 2005. Probabilistic assessment of copper bioavailability in sediments. Prepared for the International Copper Association performed by EURAS, Belgium.
- Wersin, P., Höhener, P., Giovanoli, R., Stumm, W., 1991. Early diagenetic influences on iron transformations in a freshwater lake sediment. *Chemical Geology* 90, 233-252.
- Xue, H.B., Gachter, R., Sigg, L., 1997. Comparison of Cu and Zn cycling in eutrophic lakes with oxic and anoxic hypolimnion. *Aquat. Sci.* 59, 176-189.
- Zwolsman, J.J.G., VanEck, B.T.M., VanderWeijden, C.H., 1997. Geochemistry of dissolved trace metals (cadmium, copper, zinc) in the Scheldt estuary, southwestern Netherlands: Impact of seasonal variability. *Geochim. Cosmochim. Acta* 61, 1635-1652.
